# Supplementary material for: A Phase II Trial of Albumin-Bound Paclitaxel and Gemcitabine in Patients with Newly Diagnosed Stage IV Squamous Cell Lung Cancers
Source: Oxford University Press journal article supplement (doi:10.1158/1078-0432.ccr-19-3060), 2020-01-09
Supplement: 10780432ccr193060-sup-229212_2_supp_5958648_q2f86m.docx [file 10780432ccr193060-sup-229212_2_supp_5958648_q2f86m.docx]

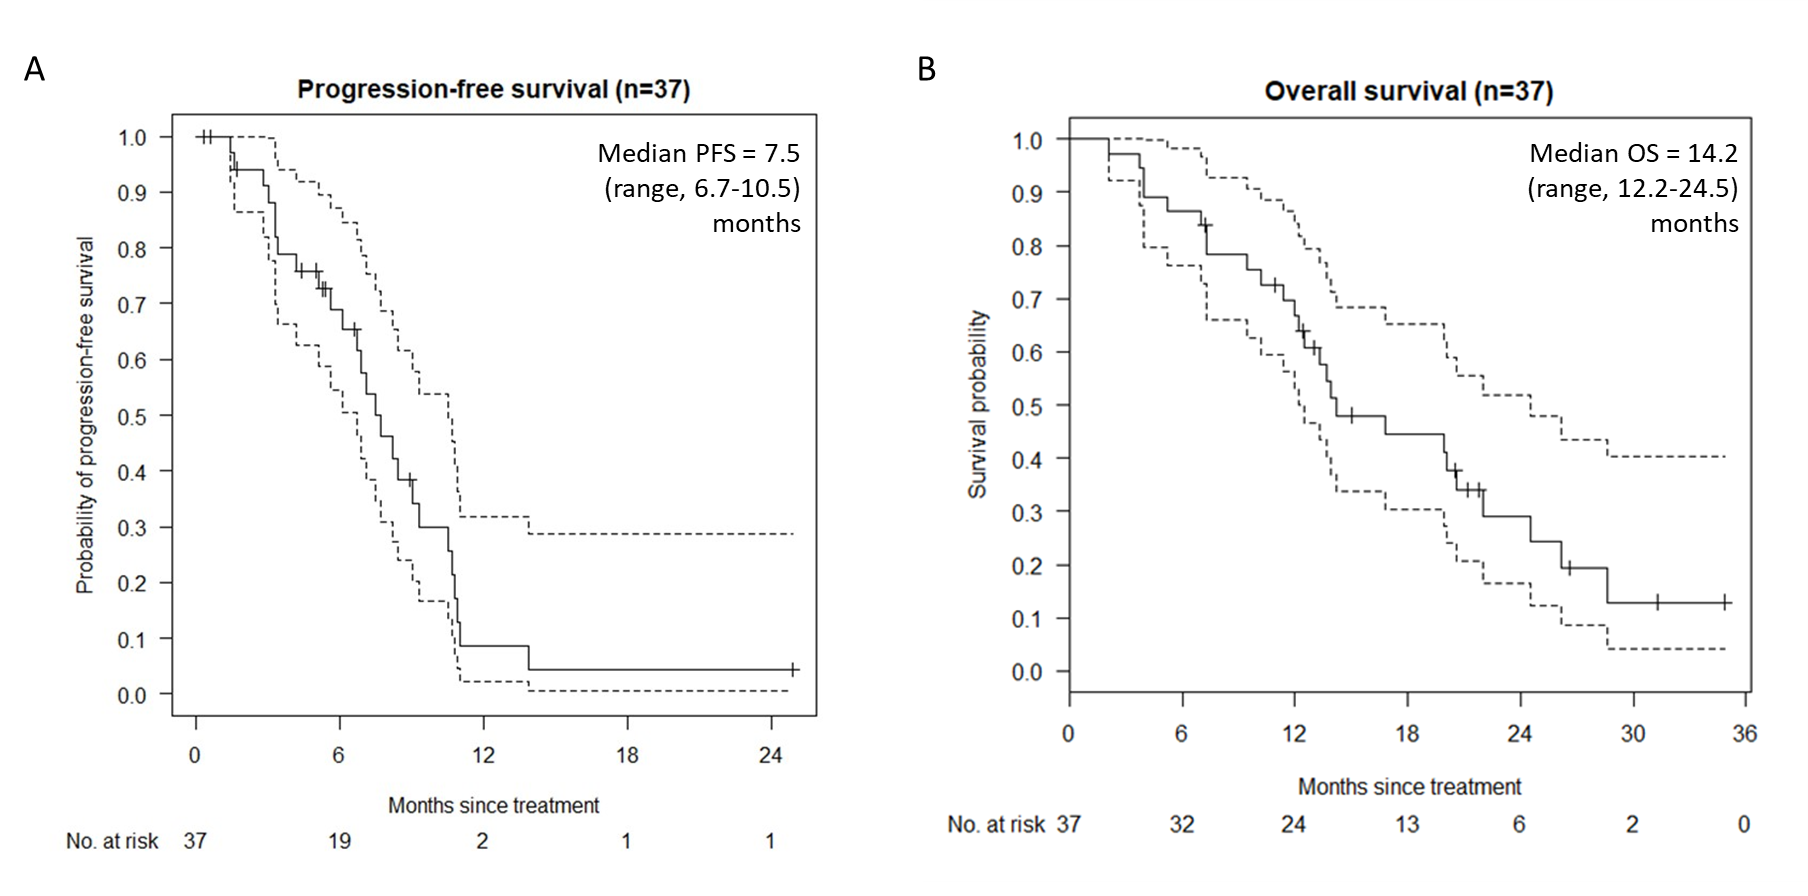


**Figure S1:** A) Kaplan Meier plot for progression-free survival and B) Kaplan Meier plot for overall survival. Dashed lines denote 95% confidence intervals. PFS, progression-free survival; OS, overall survival
