# Supplementary material for: A Phase II Trial of Albumin-Bound Paclitaxel and Gemcitabine in Patients with Newly Diagnosed Stage IV Squamous Cell Lung Cancers
Source: Oxford University Press journal article supplement (doi:10.1158/1078-0432.ccr-19-3060), 2020-01-09
Supplement: 10780432ccr193060-sup-229212_2_supp_5958649_q2f86m.docx [file 10780432ccr193060-sup-229212_2_supp_5958649_q2f86m.docx]

**Figure S2: Oncoprint of all somatic alterations detected on MSK-IMPACT**

Figure S2: Oncoprint of all somatic alterations detected on MSK-IMPACT
